# Supplementary material for: IDH-wild type glioblastomas featuring at least 30% giant cells are characterized by frequent RB1 and NF1 alterations and hypermutation
Source: Acta Neuropathol Commun. 2021 Dec 24;9:200. doi: 10.1186/s40478-021-01304-5 (PMC8709962; doi:10.1186/s40478-021-01304-5)
Supplement: Supplementary file 3 — Additional file 3: Table 1. Clinical-pathological features and Tumor mutational burden of 39 GBMs enriched in giant cells. Cases are sorted by ID number. Table 2: List of somatic and germline mutations identified in all samples. Table 3. MMR mutations, MMR immunohistochemistry, MSI and TMB in 39 giant cell enriched GBMs. Cases are arranged by TMB. [file 40478_2021_1304_MOESM3_ESM.xlsx]

## Sheet: Supplementary Table 1
Supplementary Table 1. Clinical-pathological features and Tumor mutational burden of 39 GBMs enriched in giant cells. Cases are sorted by ID number.
ID sample	Sex	Age	Site	giant cells (%)	OS months (status)	TMB (muts/Mb)
27GL	M	42	temporal	30-49%	18 (died)	16.9
28GL	F	60	frontal	≥ 50%	9 (alive)	10.6
29GL	F	71	parietal	≥ 50%	2 (alive)	49.4
30GL	M	76	occipital	30-49%	2 (alive)	26.9
31GL	M	42	frontal	30-49%	11 (alive)	10.1
32GL	F	84	temporal	≥ 50%	6 (died)	9
33GL	M	77	temporal	30-49%	9 (alive)	9
34GL	F	77	temporal	30-49%	4 (died)	13.1
38GL	M	65	frontal	≥ 50%	27 (died)	7.6
39GL	M	50	Fronto-temporal	30-49%	19 (died)	7.4
42GL	m	43	temporal	≥ 50%	72 (alive)	8.3
43GL	F	59	Parieto-temporal	≥ 50%	12 (died)	7.8
44GL	F	32	frontal	≥ 50%	8 (alive)	16
45GL	F	52	parietal	≥ 50%	14 (died)	5.35
46GL	M	43	frontal	30-49%	18 (alive)	6.95
47GL	M	56	temporal	30-49%	36 (alive)	10.8
48GL	M	37	parietal	≥ 50%	16 (died)	14.8
49GL	M	39	parietal	≥ 50%	28 (alive)	10.95
50GL	M	67	temporal	30-49%	9 (died)	8.85
51GL	F	67	parietal	30-49%	36 (alive)	10.55
52GL	M	64	temporal	30-49%	10 (alive)	8.65
53GL	F	63	temporal	≥ 50%	12 (died)	8.7
54GL	M	68	temporal	≥ 50%	9 (died)	9.15
55GL	m	15	parietal	≥ 50%	37 (alive)	8.2
56GL	F	66	temporal	≥ 50%	13 (died)	7.2
57GL	M	45	temporal	≥ 50%	8 (died)	8.55
58GL	M	36	parietal	≥ 50%	25 (alive)	153.8
59GL	M	66	frontal	30-49%	14 (died)	7.95
60GL	M	50	frontal	30-49%	24 (alive)	13.5
61GL	M	77	frontal	≥ 50%	8 (died)	6.25
62GL	F	38	third ventricle	30-49%	15 (died)	8.75
63GL	M	69	frontal	≥ 50%	17 (died)	9.3
64GL	M	63	parietal	≥ 50%	12 (died)	6.5
65GL	M	70	temporal	≥ 50%	12 (died)	25.5
66GL	M	73	temporal	≥ 50%	19 (died)	27.5
68GL	F	34	third ventricle	≥ 50%	14 (died)	9.4
69GL	M	64	parietal	≥ 50%	11 (died)	9.85
70GL	M	78	frontal	30-49%	18 (died)	10.15
71GL	F	70	temporal	≥ 50%	16 (died)	9.95
OS: overall survival. TMB: tumor mutational burden. M: male. F: female

## Sheet: Supplementary Table 2
Supplementary Table 2: List of somatic and germline mutations identified in all samples.
ID SAMPLE	GENE	Status	var_freq	Consequence	HGVSc	HGVSp	CHROM	POS	REF	ALT	EXON	INTRON	Existing_variation	SIFT	PolyPhen	CLIN_SIG	OncoKB
27GL	PTEN	somatic	28	missense_variant	NM_001304717.2:c.589G>C	NP_001291646.2:p.Asp197His	chr10	89624296	G	C	2/10		rs786201995			pathogenic	loss of function
27GL	TP53	somatic	33	missense_variant	NM_000546.5:c.838A>G	NP_000537.3:p.Arg280Gly	chr17	7577100	T	C	8/11		COSM11123		probably_damaging	pathogenic	loss of function
28GL	PTEN	somatic	72	missense_variant	NM_001304717.2:c.598T>A	NP_001291646.2:p.Tyr200Asn	chr10	89624305	T	A	2/10		rs746128825			pathogenic	loss of function
28GL	CREBBP	somatic	13	splice_acceptor_variant	NM_001079846.1:c.3869-1G>T		chr16	3790551	C	A		22/29				likely pathogenic	loss of function
29GL	DNMT3A	somatic	25	stop_gained	XM_005264175.1:c.1816C>T	XP_005264232.1:p.Gln606Ter	chr2	25467059	G	A	15/23		COSM133722			likely pathogenic	loss of function
29GL	MLH1	somatic	26	missense_variant	NM_000249.3:c.731G>A	NP_000240.1:p.Gly244Asp	chr3	37055976	G	A	9/19		rs63750303		possibly_damaging	pathogenic	unknown
29GL	SETD2	somatic	14	stop_gained	NM_014159.6:c.1270C>T	NP_054878.5:p.Arg424Ter	chr3	47164856	G	A	3/21		COSM5963724			likely pathogenic	loss of function
29GL	MET	somatic	12	missense_variant	NM_001127500.2:c.3778G>A	NP_001120972.1:p.Gly1260Ser	chr7	116423449	G	A	19/21		COSM48565	0.03	probably_damaging	likely pathogenic	unknown
29GL	TP53	somatic	29	missense_variant	NM_000546.6:c.844C>T	NP_000537.3:p.Arg282Trp	chr17	7577094	G	A	8/11		rs28934574	0	probably_damaging	pathogenic	loss of function
29GL	NF1	somatic	28	stop_gained	XM_005257983.1:c.5990G>A	XP_005258040.1:p.Trp1997Ter	chr17	29662033	G	A	40/59		rs974012306			likely pathogenic	loss of function
30GL	PTEN	somatic	79	missense_variant	NM_001304717.2:c.1037G>A	NP_001291646.2:p.Arg346His	chr10	89711900	G	A	7/10		rs121913294			pathogenic	loss of function
30GL	RB1	somatic	75	splice_acceptor_variant	NM_000321.2:c.1696-2A>G		chr13	49027127	A	G		17/26	COSM1152656			pathogenic	loss of function
30GL	TP53	somatic	79	stop_gained	NM_000546.5:c.916C>T	NP_000537.3:p.Arg306Ter	chr17	7577022	G	A	8/11		rs121913344			pathogenic	loss of function
30GL	TP53	somatic	90	missense_variant	NM_000546.5:c.466C>T	NP_000537.3:p.Arg156Cys	chr17	7578464	G	A	5/11		rs563378859	0.19	benign	pathogenic	loss of function
30GL	ATRX	somatic	85	frameshift_variant	NM_000489.4:c.5926_5929del	NP_000480.3:p.Asn1976LeufsTer5	chrX	76854906	GGATT	G	25/35					likely pathogenic	loss of function
31GL	MSH6	somatic	13	frameshift_variant	NM_000179.2:c.1804_1805insA	NP_000170.1:p.Ser602TyrfsTer5	chr2	48026926	TC	TAC	4/10					likely pathogenic	loss of function
31GL	FGFR3	somatic	37	missense_variant	NM_000142.4:c.1172C>T	NP_000133.1:p.Ala391Val	chr4	1806153	C	T	9/18			1	possibly_damaging	likely pathogenic	gain of function
32GL	TSC1	somatic	23	splice_donor_variant	NM_000368.4:c.2041+2T>C		chr9	135779796	A	G		16/22	rs118203625			likely pathogenic	loss of function
33GL	MSH2	somatic	15	frameshift_variant	NM_000251.2:c.1613_1614insA	NP_000242.1:p.Asn538LysfsTer3	chr2	47693894	TAAAAACT	TAAAAAACT	10/16					likely pathogenic	loss of function
33GL	PTEN	somatic	48	stop_gained	NM_001304717.2:c.907C>T	NP_001291646.2:p.Arg303Ter	chr10	89692904	C	T	6/10		rs121909224			pathogenic	loss of function
33GL	TP53	somatic	35	frameshift_variant	NM_000546.5:c.716dup	NP_000537.3:p.Asn239LysfsTer25	chr17	7577564	G	GT	7/11					pathogenic	loss of function
34GL	MSH6	somatic	30	stop_gained	NM_000179.2:c.4003G>T	NP_000170.1:p.Glu1335Ter	chr2	48033919	T	G	10/10		COSM5609450			likely pathogenic	loss of function
34GL	PTEN	somatic	14	inframe_deletion	NM_001304717.2:c.1114_1116del	NP_001291646.2:p.Met372del	chr10	89711972	AGAT	A	7/10					pathogenic	loss of function
34GL	TP53	somatic	17	missense_variant	NM_000546.5:c.701A>G	NP_000537.3:p.Tyr234Cys	chr17	7577580	T	C	7/11		rs587780073		probably_damaging	pathogenic	loss of function
38GL	TP53	somatic	86	missense_variant	NM_000546.5:c.527delinsA	NP_000537.3:p.Cys176Tyr	chr17	7578397	TGGGGGC	TGGGGGT	5/11		rs786202962			pathogenic	loss of function
39GL	TP53	somatic	44	missense_variant	NM_000546.5:c.845G>A	NP_000537.3:p.Arg282Gln	chr17	7577093	C	T	8/11		rs730882008		probably_damaging	pathogenic	loss of function
39GL	TP53	somatic	10	missense_variant	NM_000546.5:c.743G>A	NP_000537.3:p.Arg248Gln	chr17	7577538	C	T	7/11		rs11540652		probably_damaging	pathogenic	loss of function
42GL	TP53	somatic	19	missense_variant	NM_000546.5:c.743G>A	NP_000537.3:p.Arg248Gln	chr17	7577538	C	T	7/11		rs11540652		probably_damaging	pathogenic	loss of function
42GL	NF1	somatic	8	frameshift_variant	NM_000267.3:c.3717_3736del	NP_000258.1:p.Ala1240ValfsTer2	chr17	29562636	TAGCTCGAGTTCTGGTTACTC	T	28/57					likely pathogenic	loss of function
43GL	TP53	somatic	24	missense_variant	NM_000546.5:c.542G>A	NP_000537.3:p.Arg181His	chr17	7578388	C	T	5/11		rs397514495	0.02	probably_damaging	likely pathogenic	loss of function
43GL	TP53	somatic	46	missense_variant	NM_000546.5:c.488A>G	NP_000537.3:p.Tyr163Cys	chr17	7578442	T	C	5/11		rs148924904		probably_damaging	pathogenic	loss of function
44GL	MTOR	somatic	58	missense_variant	NM_004958.3:c.7498A>T	NP_004949.1:p.Ile2500Phe	chr1	11169377	T	A	56/58		rs1057519916		probably_damaging	pathogenic	gain of function
44GL	MSH2	somatic	57	stop_gained	NM_000251.2:c.679delinsT	NP_000242.1:p.Arg227Ter	chr2	47639586	AGA	TGA	4/16					likely pathogenic	loss of function
44GL	PIK3CA	somatic	40	missense_variant	NM_006218.2:c.316G>A	NP_006209.2:p.Gly106Ser	chr3	178916929	G	A	2/21		COSM1645487	0.03	probably_damaging	likely pathogenic	gain of function
44GL	PTEN	somatic	53	missense_variant	NM_000314.4:c.455T>C	NP_000305.3:p.Leu152Pro	chr10	89692971	T	C	5/9		COSM326268		probably_damaging	likely pathogenic	unknown
44GL	RB1	somatic	41	stop_gained	NM_000321.2:c.1363C>T	NP_000312.2:p.Arg455Ter	chr13	48953760	C	T	14/27		rs121913302			pathogenic	loss of function
45GL	CDK4	germline	50	missense_variant	NM_000075.4:c.580C>T	NP_000066.1:p.Pro194Ser	chr12	58144491	G	A	5/8		rs1264069202	0.37	benign	likely pathogenic	unknown
46GL	PALB2	somatic	33	missense_variant	NM_024675.4:c.104T>C	NP_078951.2:p.Leu35Pro	chr16	23649395	A	G	2/13		rs141047069	0	probably_damaging	pathogenic	loss of function
46GL	TP53	somatic	48	missense_variant	NM_000546.5:c.1025G>C	NP_000537.3:p.Arg342Pro	chr17	7574002	C	G	10/11		rs375338359	0.01	possibly_damaging	pathogenic	loss of function
46GL	TP53	somatic	56	missense_variant	NM_000546.5:c.817C>T	NP_000537.3:p.Arg273Cys	chr17	7577121	G	A	8/11		rs121913343		probably_damaging	pathogenic	loss of function
47GL	TP53	somatic	79	missense_variant	NM_000546.5:c.796G>A	NP_000537.3:p.Gly266Arg	chr17	7577142	C	T	8/11		COSM10794	0.03	probably_damaging	pathogenic	loss of function
47GL	STAG2	somatic	77	stop_gained	NM_001042749.2:c.1810C>T	NP_001036214.1:p.Arg604Ter	chrX	123197044	C	T	19/35		COSV54356853			pathogenic	loss of function
48GL	SETD2	somatic	36	frameshift_variant	NM_014159.6:c.1058dup	NP_054878.5:p.Ser354GlufsTer8	chr3	47165067	C	CT	3/21					likely pathogenic	loss of function
48GL	PIK3CA	somatic	38	missense_variant	NM_006218.4:c.263G>A	NP_006209.2:p.Arg88Gln	chr3	178916876	G	A	2/21		rs121913287	0.06	probably_damaging	pathogenic	gain of function
48GL	NOTCH4	somatic	52	splice_acceptor_variant&coding_sequence_variant	NM_004557.4:c.4316-2_4318del		chr6	32166919	GGTGCT	G	24/30	23/29				likely pathogenic	loss of function
48GL	POLE	somatic	48	missense_variant	NM_006231.4:c.1306C>T	NP_006222.2:p.Pro436Ser	chr12	133250214	G	A	13/49		COSV57674089	0	probably_damaging	pathogenic	unknown
48GL	TP53	somatic	86	stop_gained	NM_000546.5:c.637C>T	NP_000537.3:p.Arg213Ter	chr17	7578212	G	A	6/11		rs397516436			pathogenic	loss of function
48GL	ATRX	somatic	89	splice_acceptor_variant	NM_000489.5:c.3810-1G>T		chrX	76920268	C	A		10/34				likely pathogenic	loss of function
49GL	MSH2	germline	46	missense_variant	NM_000251.2:c.565G>A	NP_000242.1:p.Ala189Thr	chr2	47637431	G	A	3/16		rs63750821	0.01	probably_damaging	uncertain significance	unknown
49GL	MLH1	somatic	86	frameshift_variant	NM_000249.3:c.727_730del	NP_000240.1:p.Asn243ValfsTer10	chr3	37055967	AAATG	A	9/19					pathogenic	loss of function
49GL	RB1	somatic	54	frameshift_variant	NM_000321.2:c.305_306del	NP_000312.2:p.Cys102TyrfsTer7	chr13	48916773	CTG	C	3/27		rs587778853			pathogenic	loss of function
49GL	TP53	somatic	49	missense_variant	NM_000546.5:c.377A>G	NP_000537.3:p.Tyr126Cys	chr17	7578553	T	C	5/11		COSM11517		probably_damaging	pathogenic	loss of function
49GL	ATRX	somatic	13	stop_gained	NM_000489.5:c.109C>T	NP_000480.3:p.Arg37Ter	chrX	76972632	G	A	2/35		rs122445108			pathogenic	loss of function
50GL	MTOR	somatic	37	missense_variant	NM_004958.3:c.6414G>T	NP_004949.1:p.Leu2138Phe	chr1	11186791	C	A	46/58				probably_damaging	likely pathogenic	unknown
50GL	TP53	somatic	31	missense_variant	NM_000546.5:c.734G>A	NP_000537.3:p.Gly245Asp	chr17	7577547	C	T	7/11		rs121912656		probably_damaging	pathogenic	loss of function
50GL	TP53	somatic	21	missense_variant	NM_000546.5:c.473G>A	NP_000537.3:p.Arg158His	chr17	7578457	C	T	5/11		rs587782144	0.1	possibly_damaging	pathogenic	loss of function
51GL	PIK3R1	somatic	28	missense_variant	NM_181523.2:c.1126G>A	NP_852664.1:p.Gly376Arg	chr5	67589138	G	A	10/16		COSM1438284		probably_damaging	likely pathogenic	loss of function
51GL	MET	somatic	40	missense_variant	NM_001127500.2:c.3029C>T	NP_001120972.1:p.Thr1010Ile	chr7	116411990	C	T	14/21		rs56391007	0.06	probably_damaging	uncertain significance	gain of function
51GL	BRAF	somatic	24	missense_variant	NM_001354609.2:c.1898A>G	NP_001341538.1:p.Tyr633Cys	chr7	140449181	T	C	16/19		COSV56423164	0	probably_damaging	likely pathogenic	unknown
51GL	NF1	somatic	32	stop_gained	NM_000267.3:c.688G>T	NP_000258.1:p.Glu230Ter	chr17	29508761	G	T	7/57		COSV62195772			likely pathogenic	loss of function
51GL	NF1	somatic	32	frameshift_variant	NM_000267.3:c.2033dup	NP_000258.1:p.Ile679AspfsTer21	chr17	29553477	A	AC	18/57		rs587781807			pathogenic	loss of function
52GL	PTEN	somatic	11	missense_variant	NM_000314.4:c.377C>G	NP_000305.3:p.Ala126Gly	chr10	89692893	C	G	5/9		COSM28884		probably_damaging	pathogenic	loss of function
52GL	RB1	somatic	28	frameshift_variant	NM_000321.2:c.892_896del	NP_000312.2:p.Pro298TyrfsTer10	chr13	48939059	ACCTTT	A	9/27					likely pathogenic	loss of function
52GL	TP53	somatic	15	missense_variant	NM_000546.5:c.743G>A	NP_000537.3:p.Arg248Gln	chr17	7577538	C	T	7/11		rs11540652		probably_damaging	pathogenic	loss of function
53GL	PTEN	somatic	10	frameshift_variant	NM_000314.4:c.956_986dup	NP_000305.3:p.Lys330PhefsTer5	chr10	89720803	T	TACTTTAACAAAAAATGATCTTGACAAAGCAA	8/9					likely pathogenic	loss of function
54GL	EGFR	somatic	94	missense_variant	NM_005228.4:c.866C>T	NP_005219.2:p.Ala289Val	chr7	55221822	C	T	7/28		rs149840192	0.02	probably_damaging	pathogenic	gain of function
54GL	TP53	somatic	23	missense_variant	NM_000546.5:c.536delinsG	NP_000537.3:p.His179Arg	chr17	7578394	TGGT	CGGT	5/11		rs1057519991			pathogenic	loss of function
55GL	TP53	somatic	58	missense_variant	NM_000546.5:c.469G>C	NP_000537.3:p.Val157Leu	chr17	7578461	C	G	5/11		COSM10670	0.51	benign	pathogenic	loss of function
56GL	DNMT3A	somatic	4	frameshift_variant	NM_022552.4:c.2461del	NP_072046.2:p.His821MetfsTer4	chr2	25459821	TG	T	21/23					likely pathogenic	loss of function
56GL	SETD2	somatic	23	stop_gained	NM_014159.6:c.6994C>T	NP_054878.5:p.Gln2332Ter	chr3	47088081	G	A	16/21					likely pathogenic	loss of function
56GL	PTEN	somatic	33	missense_variant	NM_000314.4:c.959delinsC	NP_000305.3:p.Leu320Ser	chr10	89720808	TAAC	CAAC	8/9					likely pathogenic	loss of function
56GL	KRAS	somatic	42	inframe_insertion	NM_001369787.1:c.38_40dup	NP_001356716.1:p.Gly13dup	chr12	25398278	A	ACGC	2/5					likely pathogenic	unknown
56GL	TP53	somatic	36	splice_acceptor_variant	NM_000546.5:c.783-5_794del		chr17	7577143	CAGTAGATTACCACTACT	C	8/11	7/10				likely pathogenic	loss of function
57GL	RB1	somatic	55	frameshift_variant	NM_000321.2:c.19dup	NP_000312.2:p.Arg7ProfsTer24	chr13	48954220	G	C	1/27		rs1131690852			pathogenic	loss of function
58GL	ARID1A	somatic	24	stop_gained	NM_006015.6:c.1114C>T	NP_006006.3:p.Gln372Ter	chr1	27024008	C	T	1/20		COSV61390927			likely pathogenic	loss of function
58GL	ARID1A	somatic	14	splice_acceptor_variant	NM_006015.6:c.1351-1G>A		chr1	27057642	G	A		2/19	COSV61372395			likely pathogenic	loss of function
58GL	MSH6	somatic	34	stop_gained	NM_000179.2:c.1444C>T	NP_000170.1:p.Arg482Ter	chr2	48026566	C	T	4/10		rs63750909			pathogenic	loss of function
58GL	ATR	somatic	43	splice_acceptor_variant	NM_001184.4:c.7350-1G>A		chr3	142177954	C	T		43/46				likely pathogenic	loss of function
58GL	PIK3CA	somatic	43	missense_variant	NM_006218.4:c.2815G>A	NP_006209.2:p.Asp939Asn	chr3	178948043	G	A	20/21			0.68	benign	likely pathogenic	unknown
58GL	NOTCH4	somatic	34	splice_donor_variant	NM_004557.4:c.4617+2T>C		chr6	32166424	A	G		25/29				likely pathogenic	loss of function
58GL	MET	somatic	20	missense_variant	NM_001127500.3:c.4018C>T	NP_001120972.1:p.Pro1340Ser	chr7	116435969	C	T	21/21			0	possibly_damaging	likely pathogenic	unknown
58GL	FGFR2	somatic	33	missense_variant	NM_022970.3:c.301G>A	NP_075259.4:p.Asp101Asn	chr10	123325027	C	T	3/18		COSM1152154		probably_damaging	uncertain significance	gain of function
58GL	PTPN11	somatic	32	missense_variant	NM_001330437.1:c.226G>A	NP_001317366.1:p.Glu76Lys	chr12	112888210	G	A	3/16		rs121918464	0.01	probably_damaging	pathogenic	gain of function
58GL	DICER1	somatic	40	missense_variant	NM_001271282.3:c.5437G>A	NP_001258211.1:p.Glu1813Lys	chr14	95557630	C	T	25/27		COSV58615431	0	possibly_damaging	pathogenic	loss of function
58GL	CREBBP	somatic	21	stop_gained	NM_004380.3:c.3310C>T	NP_004371.2:p.Gln1104Ter	chr16	3808914	G	A	17/31		rs587783479			likely pathogenic	loss of function
58GL	CREBBP	somatic	20	stop_gained	NM_004380.3:c.2548C>T	NP_004371.2:p.Gln850Ter	chr16	3820903	G	A	14/31		COSV52135450			likely pathogenic	loss of function
58GL	TP53	somatic	94	missense_variant	NM_000546.5:c.404G>A	NP_000537.3:p.Cys135Tyr	chr17	7578526	C	T	5/11		rs587781991		probably_damaging	pathogenic	loss of function
58GL	NF1	somatic	20	splice_acceptor_variant	NM_000267.3:c.480-1G>A		chr17	29496908	G	A		4/56	COSV62218371			pathogenic	loss of function
58GL	NF1	somatic	26	splice_donor_variant	XM_005257983.1:c.2251+1G>A		chr17	29553703	G	A		18/58	COSM5609549			pathogenic	loss of function
58GL	NF1	somatic	25	splice_donor_variant	XM_005257983.1:c.8160+1G>A		chr17	29686034	G	A		56/58				likely pathogenic	loss of function
58GL	BRCA1	somatic	30	missense_variant	NM_007300.4:c.212G>A	NP_009231.2:p.Arg71Lys	chr17	41258473	C	T	4/24		rs80356913	0	probably_damaging	pathogenic	unknown
58GL	RNF43	somatic	22	splice_donor_variant	NM_017763.5:c.252+1G>A		chr17	56492686	C	T		2/9	COSV60414944			likely pathogenic	loss of function
58GL	CHEK2	somatic	34	stop_gained	NM_001005735.1:c.85C>T	NP_001005735.1:p.Gln29Ter	chr22	29130625	G	A	2/16		rs761494650			pathogenic	loss of function
58GL	AR	somatic	41	missense_variant	NM_000044.6:c.1015C>T	NP_000035.2:p.Leu339Phe	chrX	66766003	C	T	1/8		rs755644981	0	possibly_damaging	likely pathogenic	unknown
58GL	AR	somatic	42	missense_variant	NM_000044.6:c.2096C>T	NP_000035.2:p.Ala699Val	chrX	66931454	C	T	4/8			0.03	probably_damaging	pathogenic	unknown
58GL	ATRX	somatic	39	missense_variant	NM_000489.5:c.5065C>T	NP_000480.3:p.Leu1689Phe	chrX	76888764	G	A	19/35			0	probably_damaging	likely pathogenic	unknown
59GL	RB1	somatic	22	frameshift_variant	NM_000321.2:c.2222del	NP_000312.2:p.Arg741LeufsTer3	chr13	49039143	CG	C	22/27		COSV57295166			likely pathogenic	loss of function
59GL	TP53	somatic	31	missense_variant	NM_000546.5:c.742C>T	NP_000537.3:p.Arg248Trp	chr17	7577539	G	A	7/11		rs121912651		probably_damaging	pathogenic	loss of function
59GL	NF1	somatic	32	frameshift_variant	XM_005257983.1:c.3822_3823del	XP_005258040.1:p.Phe1275ProfsTer8	chr17	29562737	ACT	A	28/59		COSM132826			pathogenic	loss of function
60GL	MTOR	somatic	11	missense_variant	NM_004958.4:c.6809G>A	NP_004949.1:p.Arg2270Gln	chr1	11182037	C	T	48/58		rs752641006	1	benign	likely pathogenic	unknown
60GL	MSH6	germline	41	missense_variant	NM_000179.2:c.2314C>T	NP_000170.1:p.Arg772Trp	chr2	48027436	C	T	4/10		rs63750138		probably_damaging	likely pathogenic	unknown
60GL	TGFBR2	germline	43	missense_variant	NM_001024847.2:c.1141C>T	NP_001020018.1:p.Arg381Trp	chr3	30713741	C	T	5/8		rs199660234	0.01	probably_damaging	likely pathogenic	unknown
60GL	PIK3R1	somatic	54	frameshift_variant	NM_181523.2:c.344_345del	NP_852664.1:p.Leu115ProfsTer11	chr5	67569223	ACT	A	3/16					likely pathogenic	loss of function
60GL	TP53	somatic	52	missense_variant	NM_000546.5:c.733G>A	NP_000537.3:p.Gly245Ser	chr17	7577548	C	T	7/11		rs28934575		probably_damaging	pathogenic	loss of function
60GL	NF1	somatic	44	frameshift_variant	NM_000267.3:c.1019_1020del	NP_000258.1:p.Ser340CysfsTer12	chr17	29527567	ACT	A	9/57		rs1555610903			pathogenic	loss of function
61GL	PTEN	somatic	52	missense_variant	NM_000314.4:c.466G>A	NP_000305.3:p.Gly156Arg	chr10	89692982	G	A	5/9		COSM5103	0.04	probably_damaging	likely pathogenic	unknown
61GL	NF1	somatic	29	frameshift_variant	XM_005257983.1:c.3915dup	XP_005258040.1:p.Arg1306ThrfsTer8	chr17	29562979	T	TA	29/59					likely pathogenic	loss of function
62GL	PDGFRA	germline	76	missense_variant	NM_001347828.1:c.1739A>G	NP_001334757.1:p.Tyr580Cys	chr4	55141018	A	G	13/24		rs121908589		probably_damaging	pathogenic	gain of function
62GL	TP53	somatic	37	missense_variant	NM_000546.5:c.536delinsG	NP_000537.3:p.His179Arg	chr17	7578394	TGGTG	CGGTG	5/11		rs1057519991			pathogenic	loss of function
62GL	ATRX	somatic	37	stop_gained	NM_000489.3:c.4160C>G	NP_000480.2:p.Ser1387Ter	chrX	76912104	G	C	13/35		COSM3973920&COSM3973921			likely pathogenic	loss of function
63GL	PIK3R1	somatic	44	inframe_deletion	NM_181523.3:c.1390_1392del	NP_852664.1:p.Asp464del	chr5	67589624	TATG	T	11/16					likely pathogenic	unknown
63GL	BRCA2	somatic	68	frameshift_variant	NM_000059.3:c.1219del	NP_000050.2:p.Gln407ArgfsTer23	chr13	32906831	GC	G	10/27		rs80359267			pathogenic	loss of function
63GL	TP53	somatic	35	missense_variant	NM_000546.5:c.820delinsT	NP_000537.3:p.Val274Phe	chr17	7577114	CAAAC	CAAAA	8/11		rs1057520005			pathogenic	loss of function
64GL	-	-	-	-	-	-	-	-	-	-	-	-	-	-	-	-	-
65GL	TP53	somatic	10	missense_variant	NM_000546.5:c.818G>A	NP_000537.3:p.Arg273His	chr17	7577120	C	T	8/11				probably_damaging	pathogenic	loss of function
65GL	NF1	somatic	24	frameshift_variant	NM_000267.3:c.5011dup	NP_000258.1:p.Tyr1671LeufsTer3	chr17	29653075	G	GT	36/57					likely pathogenic	loss of function
65GL	NF1	somatic	28	stop_gained	XM_005257983.1:c.5990G>A	XP_005258040.1:p.Trp1997Ter	chr17	29662033	G	A	40/59		rs974012306			likely pathogenic	loss of function
66GL	MSH2	somatic	11	stop_gained	NM_000251.2:c.862C>T	NP_000242.1:p.Gln288Ter	chr2	47641477	C	T	5/16		rs63750097			pathogenic	loss of function
66GL	TP53	somatic	38	stop_gained	NM_000546.5:c.592G>T	NP_000537.3:p.Glu198Ter	chr17	7578257	C	A	6/11		COSM118010			pathogenic	loss of function
66GL	CHEK2	somatic	11	stop_gained	NM_001005735.1:c.279G>A	NP_001005735.1:p.Trp93Ter	chr22	29130431	C	T	2/16		rs587782070			pathogenic	loss of function
68GL	CDKN2A	somatic	17	frameshift_variant	NM_001195132.1:c.47_50del	NP_001182061.1:p.Leu16ProfsTer9	chr9	21974776	GGCCA	G	1/4		rs587782206			pathogenic	loss of function
68GL	TP53	somatic	17	frameshift_variant	NM_000546.5:c.945_946del	NP_000537.3:p.Gln317AlafsTer19	chr17	7576899	GGA	G	9/11		COSM111396			pathogenic	loss of function
68GL	NF1	somatic	22	frameshift_variant	XM_005257983.1:c.6852_6855del	XP_005258040.1:p.Tyr2285ThrfsTer5	chr17	29665751	CACTT	C	46/59		COSM3179958			pathogenic	loss of function
69GL	TP53	somatic	60	missense_variant	NM_000546.5:c.707A>G	NP_000537.3:p.Tyr236Cys	chr17	7577574	T	C	7/11		rs730882026		probably_damaging	pathogenic	loss of function
70GL	TP53	somatic	51	inframe_insertion	NM_001126112.2:c.439_462dup	NP_001119584.1:p.Val147_Gly154dup	chr17	7578467	T	TGCCGGGCGGGGGTGTGGAATCAAC	5/11					likely pathogenic	unknown
70GL	NF1	somatic	30	frameshift_variant	NM_000267.3:c.4974_4977del	NP_000258.1:p.Tyr1659ThrfsTer17	chr17	29653035	TATATC	TA	36/57					likely pathogenic	loss of function
71GL	PIK3CA	somatic	34	missense_variant	NM_006218.2:c.1412C>T	NP_006209.2:p.Pro471Leu	chr3	178928226	C	T	9/21		rs1057519872		possibly_damaging	likely pathogenic	gain of function
71GL	PIK3R1	somatic	92	inframe_deletion	NM_181523.3:c.1362_1364del	NP_852664.1:p.Gln455del	chr5	67589598	CTCA	C	11/16					likely pathogenic	unknown
71GL	TSC2	somatic	32	frameshift_variant	NM_000548.5:c.4553del	NP_000539.2:p.Ile1518ThrfsTer58	chr16	2135010	AT	A	35/42					likely pathogenic	loss of function
71GL	TP53	somatic	69	inframe_deletion	NM_000546.5:c.764_766del	NP_000537.3:p.Ile255del	chr17	7577514	GTGA	G	7/11		rs1064794309			pathogenic	loss of function

## Sheet: Supplementary Table 3
Supplementary Table 3. MMR mutations, MMR immunohistochemistry, MSI and TMB in 39 giant cell enriched GBMs. Cases are arranged by TMB.
Case	MMR mutation				MMR IHC				MSI	TMB (muts/Mb)
	MLH1	PMS2	MSH2	MSH6	MLH1	PMS2	MSH2	MSH6
45GL					retained	retained	retained	retained	no	5.35
61GL					retained	retained	retained	retained	no	6.25
64GL					retained	retained	retained	retained	no	6.5
46GL					retained	retained	retained	retained	no	6.95
56GL					retained	retained	retained	retained	no	7.2
39GL					retained	retained	retained	retained	no	7.4
38GL					retained	retained	retained	retained	no	7.6
43GL					retained	retained	retained	retained	no	7.8
59GL					retained	retained	retained	retained	no	7.95
55GL					retained	retained	retained	retained	no	8.2
42GL					retained	retained	retained	retained	no	8.3
57GL					retained	retained	retained	retained	no	8.55
52GL					retained	retained	retained	retained	no	8.65
53GL					retained	retained	retained	retained	no	8.7
62GL					retained	retained	retained	retained	no	8.75
50GL					retained	retained	retained	retained	no	8.85
32GL					retained	retained	retained	retained	no	9
33GL			yes		retained	retained	retained	retained	no	9
54GL					retained	retained	retained	retained	no	9.15
63GL					retained	retained	retained	retained	no	9.3
68GL					retained	retained	retained	retained	no	9.4
69GL					retained	retained	retained	retained	no	9.85
71GL					retained	retained	retained	retained	no	9.95
31GL				yes	retained	retained	lost	lost	no	10.1
70GL					retained	retained	retained	retained	no	10.15
51GL					retained	retained	retained	retained	no	10.55
28GL					retained	retained	retained	retained	no	10.6
47GL					retained	retained	retained	retained	no	10.8
49GL	yes		yes		lost	lost	retained	retained	no	10.95
34GL				yes	retained	retained	retained	retained	no	13.1
60GL				yes	retained	retained	lost	lost	no	13.5
48GL					retained	retained	retained	retained	no	14.8
44GL			yes		retained	retained	lost	lost	no	16
27GL					retained	retained	retained	retained	no	16.9
65GL					retained	retained	retained	retained	no	25.5
30GL					retained	retained	lost	lost	yes	26.9
66GL			yes		retained	retained	lost	lost	no	27.5
29GL	yes				lost	lost	retained	retained	yes	49.4
58GL				yes	retained	retained	retained	lost	no	153.8
IHC: immunohistochemistry.
